# Supplementary material for: Evo-devo models of tooth development and the origin of hominoid molar diversity
Source: PubMed Central journal article supplement — Sci Adv. 2018 Apr 11;4(4):eaar2334. doi: 10.1126/sciadv.aar2334 (PMC5895448; doi:10.1126/sciadv.aar2334), 2018-04-11
Supplement: aar2334_SM.pdf [file aar2334_SM.pdf]

## Supplementary Materials for **Evo-devo models of tooth development and the origin of hominoid molar diversity**

Alejandra Ortiz, Shara E. Bailey, Gary T. Schwartz, Jean-Jacques Hublin, Matthew M. Skinner

Published 11 April 2018, *Sci. Adv.* **4**, ear2334 (2018)

DOI: 10.1126/sciadv.aar2334

### **This PDF file includes:**

- Supplementary Materials and Methods
- fig. S1. Relationship between mean relative intercusp distance and Carabelli's cusp per genus.
- fig. S2. Relationship between mean relative intercusp distance and Carabelli's cusp per molar type in *Homo*.
- fig. S3. Right lower molar with example of homologous landmarks (yellow dots) placed at the cusp tips from which Euclidean distances were calculated.
- fig. S4. Ordinary least squares regression of upper (top row) and lower (bottom row) molar size comparisons estimated from crown outline, centroid size, and 3D surface area.
- table S1. Ordered logistic regression of cusp expression and relative intercusp distance.
- table S2. Fossil hominin upper molars used in this study including accession number, locality/site, and source.
- table S3. Fossil hominin lower molars used in this study including accession number, locality/site, and source.
- table S4. System used in this study for scoring accessory cusps.
- table S5. Tooth size comparisons estimated from crown outline, centroid size, and 3D surface area.
- References (34–50)

## Supplementary Materials and Methods

### Micro-computed tomography and three-dimensional surface reconstruction

Scanning was conducted on a SKYSCAN 1172 Desktop Scanner using the following parameters: 100 kV, 94  $\mu$ A, 2.0 mm aluminum and copper filter, 0.12 rotation step, 360 degrees of rotation, and 2-frame averaging. Raw projections were converted into TIFF image stacks using NRecon with the isometric voxel dimensions of the resultant images ranging from 14 to 30 micrometers. The complete image stack of each tooth was filtered using a computer-programmed macro that employs a three-dimensional median and mean-of-least-variance filter (each with a kernel size of three) to improve tissue gray-scale homogeneity (34) and then manually segmented into enamel and dentine components using Avizo/Amira (FEI Visualization Sciences Group). Only teeth with minor wear (equivalent to Molnar's [35] first three wear stages) and well-distinguished gray-scale pixel values were segmented and used in the study. After segmentation, enamel-dentine junction (EDJ) surfaces were each reconstructed as a triangle-based surface model (surface generation module using the *unconstrained smoothing* parameter). When necessary, small missing parts of the EDJ due to wear or damage were reconstructed in Geomagic Studio (3D Systems) following the curvature of teeth. Reconstruction of 18 damaged teeth were performed twice and differences between reconstructions were non-significant (paired-*t* test; *t*: 0.1951; *p*-value: 0.8476; df: 17). The digital models of the EDJ were manipulated on Avizo/Amira for landmark digitizing and trait scoring.

### Scoring procedures

The expression of upper molar cusp 5 (UMC5) and lower molar cusps 5, 6, and 7 (LMC5, LMC6, and LMC7) was scored following the Arizona State University Dental Anthropology System (ASUDAS) (36), with minor modifications specified in table S4. Morphological manifestations of mesiolingual features (including Carabelli's cusp) of the upper molars differ markedly among hominoids (25, 37-41). For simplicity, all mesiolingual features are referred to as Carabelli's cusp, although homology of these features among taxa remains unknown (25). Scoring criteria for Carabelli's cusp followed those of (25) and (40) for great apes and australopiths, respectively. Carabelli's cusp expression in later hominins was recorded using the ASUDAS (36). The expression of UM hypocone, upper molar cusp 6 (UMC6), and LM "double" C6 was scored as either present or absent.

To facilitate statistical analyses, Carabelli's cusp was subsequently classified into four categories: "absent", "faint", "medium", and "large" (table S4). Similarly, expression of UMC5, LMC5, LMC6 and LMC7 was divided into "absent" (ASUDAS grade 0), "suspected", "faint" (ASUDAS grade 1), "medium" (ASUDAS grades 2-3), and "large" (ASUDAS grades 4-5). As per (18) the "suspected" category indicates the presence of a subtle bump on the marginal ridge that may represent a poorly developed accessory cusp. All data were observed and collected at the EDJ. Skinner and Gunz (18) also suggested that poorly developed or "suspected" LMC6 could represent instances in which the available space between adjacent cusps allowed the formation of a new secondary enamel knot whose growth as a cusp did not progress substantially due to the onset of calcification of the tooth crown. This not only applies to "suspected" LMC6, but likely also to all other accessory cusps. In all instances in which accessory cusp data were only analyzed by presence/absence, teeth having the "suspected" category were not included. In order to test for intra-observer error in scoring cusp expression, 25 randomly selected teeth were scored twice by AO, with scoring sessions separated by six weeks. Error was 2.67%, which

is similar or lower than that previously reported (42-43). Only two cases of trait disagreement between the two scoring sessions were found, with this disagreement being of one grade only. No disagreements in trait presence (vs. absence) were observed.

### Intercusp distance

Three-dimensional landmarks were digitized on the EDJ using Avizo. In addition to serving as a proxy for the final shape of the inner enamel epithelium (IEE) of the developing tooth germ, using the EDJ allows the cusp apices (dentine horns) to be located with greater accuracy than at the outer enamel surface, especially when tooth wear is not extensive (24). This is important considering that measurement error in intercusp distances reported by (17, 19) was up to 30% for their two-dimensional analyses of recent *H. sapiens* upper molars at the enamel surface.

First, second, and third molars were pooled and separated into groups according to the number of cusps (i.e., upper molars with four, five or six cusps and lower molars with four, five, six or seven cusps). This was done to maximize sample size per fossil taxon, and given that the PCM was formulated to explain cusp number and size regardless of tooth type, this approach should not alter the final outcome of the study. In each group, homologous landmarks were placed at the tip of the dentine horns of all cusps present such that the number of landmarks corresponds to the total number of cusps in the tooth crown. No grouping was exclusively based on Carabelli's cusp given that this feature is not necessarily associated with the presence of a dentine horn, which is only seen on ASUDAS grades 5-7 (25). For the four main cusps (protocone, paracone, metacone, and hypocone) of the upper molars, the first landmark was placed on the tip of the protocone and subsequent points were placed following a buccal direction on the tip of the paracone, metacone, and hypocone, respectively. When accessory cusps were present, landmarks on the tip of cusps 5 and 6 were placed after the landmark associated with the hypocone. Collection of landmarks on the lower molars started at the tip of the protoconid, with subsequent landmarks made on the cusp tips of the metaconid, entoconid, hypoconid, and when present, the hypoconulid, entoconulid, and metaconulid in that order (fig. S3). This order follows the general sequence of cusp development extensively documented for humans and other primates (44-47) Intercusp distances (Euclidean distances) were derived from these landmarks, and given that they were placed on 3D surface models, these Euclidean distances account for cusp differences in both height and position.

### Tooth size

Tooth size at the EDJ was estimated in three different ways. First, tooth size was obtained from crown outlines as per (17, 19-20). To that end, each 3D model was manually oriented so that the occlusal surface was perpendicular to the optical axis of the screen and the main buccolingual and mesiodistal grooves are parallel to the x- and y-axes, respectively. Once in proper orientation, a scale was added, and screenshots of the crown occlusal surface were saved as .jpg files. The area of the crown outline of each tooth was calculated in Adobe Photoshop®. We also followed Skinner and Gunz's (18) 3D geometric morphometrics approach and used centroid size as a proxy for tooth size. To calculate centroid size, a set of landmarks was digitized along the upper and lower molar marginal ridge, with the first landmark placed at the midpoint of the mesial marginal ridge between the two mesial cusps. Subsequent landmarks were digitized following a buccal and lingual direction for upper and lower molars, respectively. After the first coordinate, all subsequent landmarks were placed at the lowest point on the marginal ridge of

two given adjacent cusps. Neither “suspected” cusps nor cusp 7 were considered when collecting this second set of landmarks. The use of the mesial marginal ridge, however, may underestimate tooth size in taxa where the base of the crown is much wider than the occlusal surface. Finally, we calculated the 3D surface area of the EDJ crown (32) in Rhino 5.0 (Robert McNeel & Associates). To ensure consistency among specimens, we followed recommendations by (33) in which all 3D models were first simplified to 10,000 faces and smoothed at 100 iterations with a 0.6 lambda value using Avizo/Amira. Following previous studies (17, 19-20), the square root of the 2D and 3D crown area was used for statistical analysis.

As shown in fig. S4 and table S5, there is a high and significant correlation among the three different estimates of tooth size. Given that tooth size was ultimately used as a proxy for the duration of crown morphogenesis and size of the IEE, developmentally, the reasonable approach was to use 3D surface area to test how well the PCM explains molar cuspal patterns.

### Statistical analysis

All statistical analyses were performed in PAST (48) or R (49; packages “MASS” and “VGAM”). Unless otherwise noted, differences were considered significant at  $\alpha = 0.05$ . Following (17), the non-parametric Kendall’s rank correlation test and ordered logistic regression (OLR) models were used to examine the relationship between relative intercuspal spacing (i.e., intercuspal distance divided by tooth size) and the presence and degree of expression of accessory cusps. While the former test evaluates only the strength and direction of this relationship, OLR assumes a causal relationship between variables such that accessory cusp expression (response variable) is modeled as a factor of relative intercuspal distance (explanatory variable). Each OLR model yields a single coefficient value (from which the odds ratio is calculated) and separate intercepts for each cut-point between grades of expression (50). As per (17, 19) a value of 0.1 equals a unit in relative intercuspal distance, with odds ratios also scaled to this value. The overall fit of the models was evaluated with the likelihood ratio test (G) in comparison to the null or constant-only model in which a single value is associated with the explanatory variable. In all cases, calculation of the average intercuspal distances was based on the spacing between all previously-formed cusps to the exclusion of the accessory cusp being studied. Analyses on single intercuspal distances were also conducted to assess whether, for any given accessory cusp, the spacing of adjacent cusps more strongly influence its presence and expression.

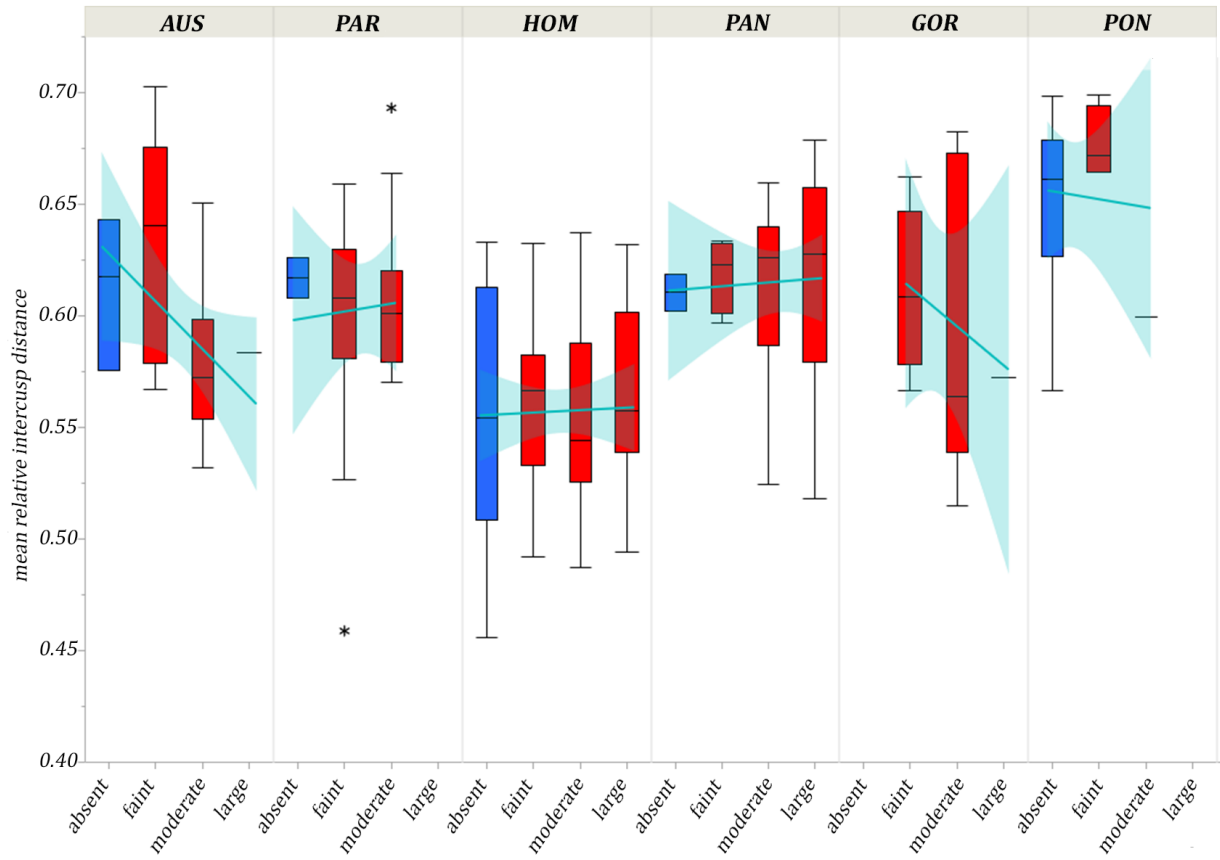

**fig. S1. Relationship between mean relative intercuspal distance and Carabelli's cusp per genus.** Line of fit and 95% confidence intervals for each dataset added in light blue only for visualization purposes. The PCM predicts a negative relationship between Carabelli's cusp expression and mean relative intercuspal distance. For box plots, cusp absence in blue and cusp presence (faint to large) in red. Abbreviations, AUS: *Australopithecus*, PAR: *Paranthropus*, HOM: *Homo*, PAN: *Pan*, GOR: *Gorilla*, and PON: *Pongo*.

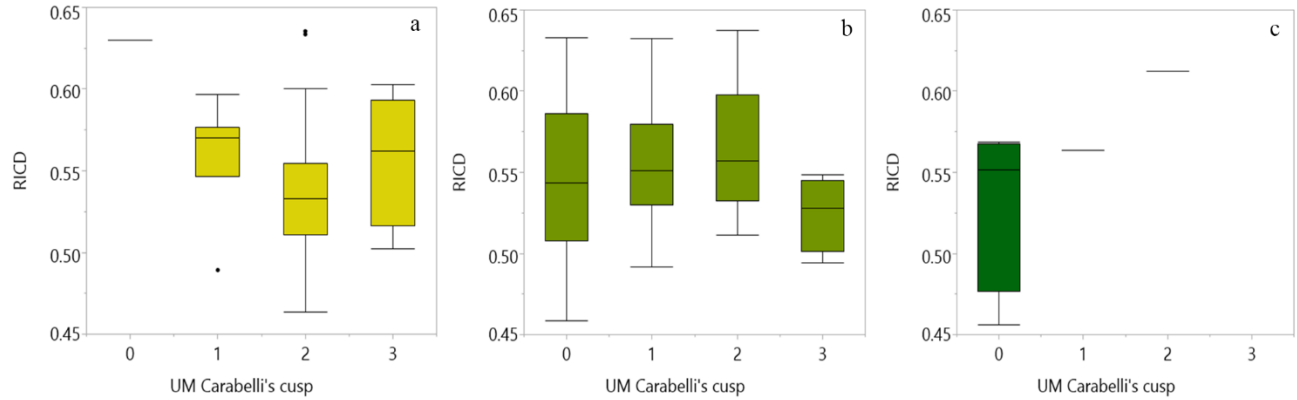

**fig. S2. Relationship between mean relative intercusp distance and Carabelli's cusp per molar type in *Homo*.** Scores: 0=absent; 1=faint CC present; 2=medium-sized CC present; 3=large CC present. The PCM predicts a negative relationship between Carabelli's cusp expression and RICD. Upper (a) M1, (b) M2, and (c) M3 analyzed independently to assess whether the timing of molar development influences the applicability of the PCM.

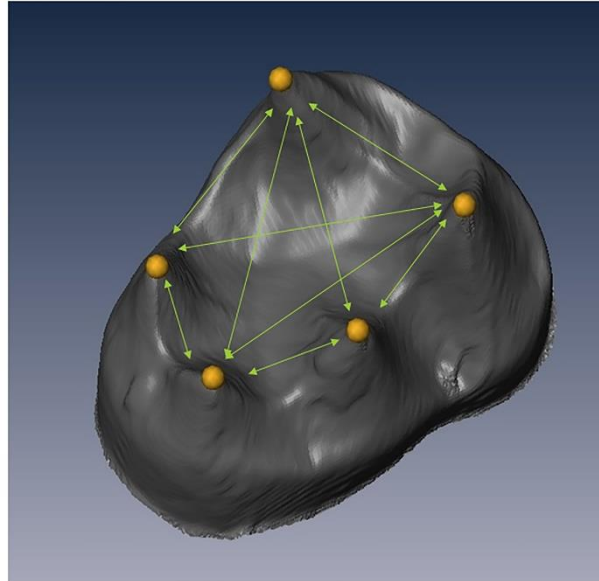

**fig. S3. Right lower molar with example of homologous landmarks (yellow dots) placed at the cusp tips from which Euclidean distances were calculated.** Arrows indicate pairwise distances taken for each tooth.

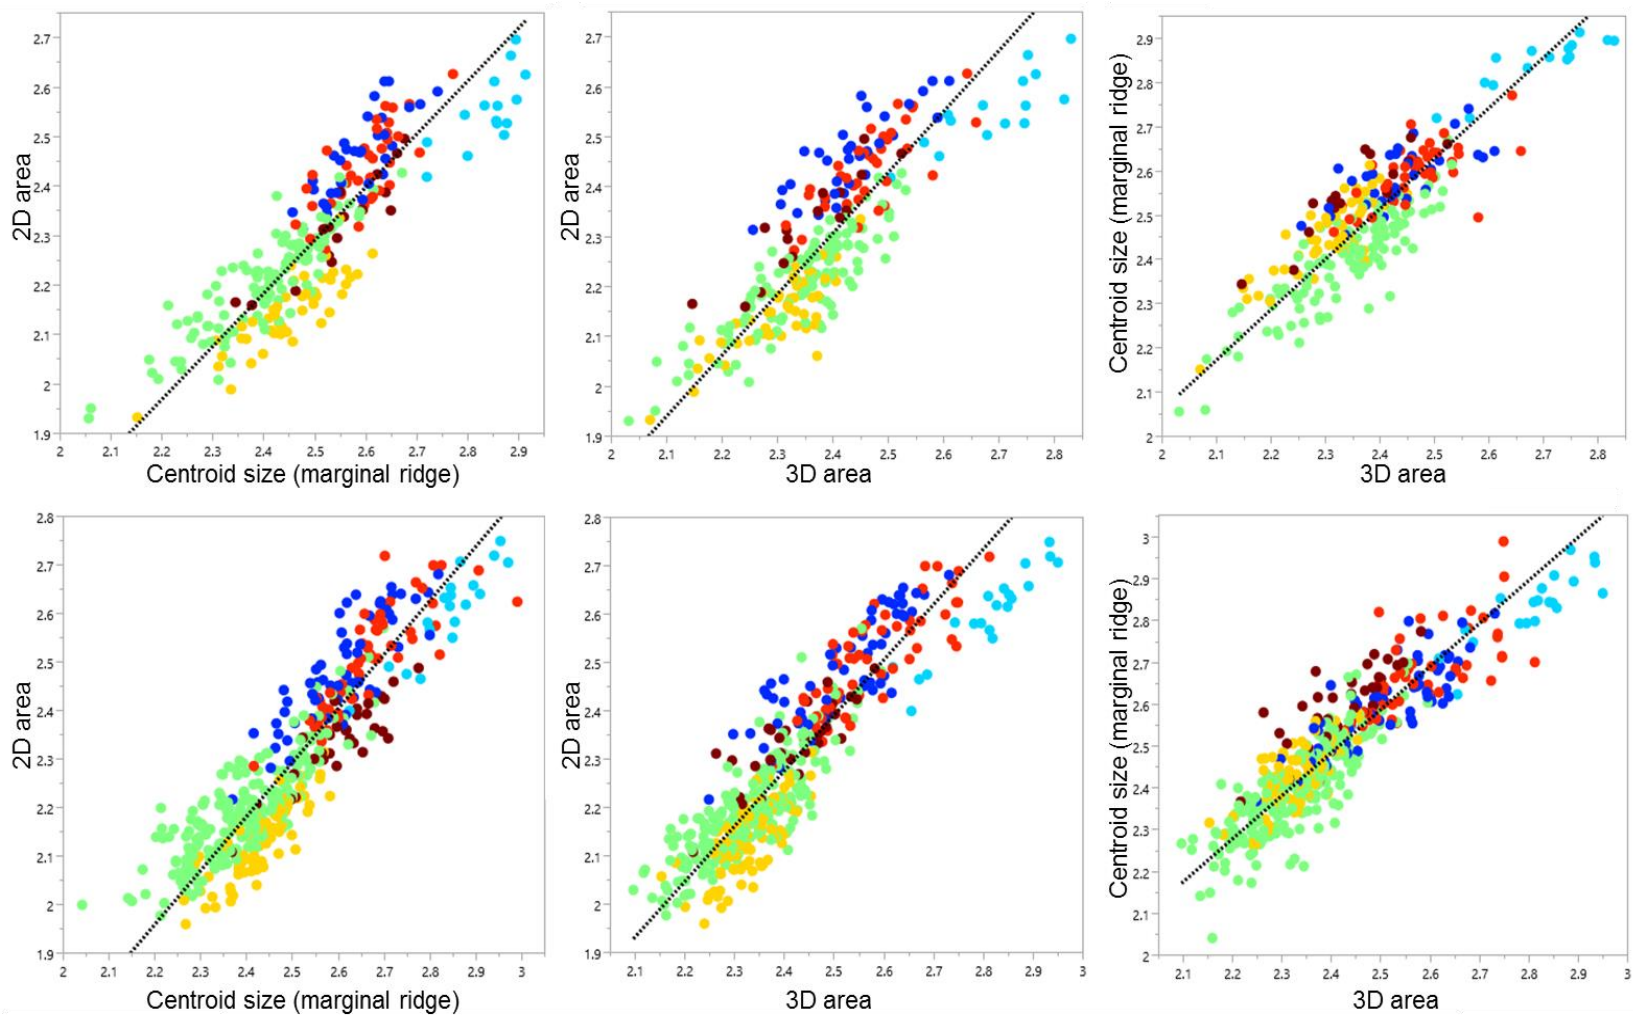

**fig. S4. Ordinary least squares regression of upper (top row) and lower (bottom row) molar size comparisons estimated from crown outline, centroid size, and 3D surface area.** Comparisons performed on the logged data. Legend: *Australopithecus*: blue; *Paranthropus*: red; *Homo*: light green; *Pan*: yellow; *Gorilla*: light blue; *Pongo*: brown.

**table S1. Ordered logistic regression of cusp expression and relative intercusp distance.**

| Taxon                      | n   | Cusp        | Relative distance | Coefficient | Intercept |        |       |       |      | df  | AIC    | LL (h1) | LL (h0) | p-value*       | odds** |
|----------------------------|-----|-------------|-------------------|-------------|-----------|--------|-------|-------|------|-----|--------|---------|---------|----------------|--------|
|                            |     |             |                   |             | 0 1       | 1 2    | 2 3   | 3 4   | 4 5  |     |        |         |         |                |        |
| <i>Australopithecus</i>    | 24  |             | mean              | -19.04      | -13.57    | -12.13 | -7.91 | N/A   | N/A  | 72  | 52.53  | -22.27  | -24.31  | < <b>0.05</b>  | 0.15   |
| <i>Paranthropus</i>        | 24  |             | mean              | 2.79        | -0.73     | 1.85   | -     | N/A   | N/A  | 48  | 50.15  | -22.08  | -22.13  | N.S.           | 1.32   |
| <i>Homo</i>                | 79  | Carabelli's | mean              | 0.75        | -1.21     | 0.03   | 2.35  | N/A   | N/A  | 237 | 206.51 | -99.26  | -99.27  | N.S.           | 1.08   |
| <i>H. sapiens</i> (recent) | 35  | cusp        | mean              | 9.95        | 3.56      | 5.23   | 7.26  | N/A   | N/A  | 105 | 95.65  | -43.82  | -44.50  | N.S.           | 2.70   |
| <i>Pan</i>                 | 35  |             | mean              | 2.10        | -1.52     | -0.29  | 1.35  | N/A   | N/A  | 105 | 86.98  | -39.49  | -39.52  | N.S.           | 1.23   |
| <i>Gorilla</i>             | 11  |             | mean              | -7.50       | -         | -4.71  | -2.14 | N/A   | N/A  | 22  | 26.10  | -10.05  | -10.28  | N.S.           | 0.47   |
| <i>Australopithecus</i>    | 35  |             | me-hyp            | 9.87        | 6.66      | 7.51   | 7.76  | 8.84  | 9.57 | 175 | 83.36  | -35.68  | -36.82  | N.S.           | 2.68   |
| <i>Paranthropus</i>        | 39  |             | me-hyp            | 13.79       | 8.36      | 9.67   |       | 11.64 |      | 117 | 81.94  | -36.97  | -38.78  | N.S.           | 3.97   |
| <i>Homo</i>                | 113 | UM cusp 5   | me-hyp            | -0.36       | 0.65      | 1.85   | 2.26  | 3.41  | 4.53 | 565 | 226.77 | -107.39 | -107.39 | N.S.           | 0.96   |
| <i>H. sapiens</i> (recent) | 49  |             | me-hyp            | 5.89        | 4.22      | 5.74   | 6.05  | -     | -    | 147 | 86.96  | -39.48  | -39.94  | N.S.           | 1.80   |
| <i>Pan</i>                 | 49  |             | me-hyp            | 2.75        | 2.56      | 4.07   | 4.80  | 5.52  | -    | 196 | 93.42  | -41.71  | -41.85  | N.S.           | 1.32   |
| <i>Homo</i>                | 144 | LM cusp 5   | end-hyd           | 39.39       | 19.41     | 19.46  | 20.11 | N/A   |      | 432 | 202.30 | -97.15  | -138.39 | < <b>0.001</b> | 51.37  |
| <i>H. sapiens</i> (recent) | 104 |             | end-hyd           | 40.49       |           | 20.58  | 21.21 | N/A   |      | 208 | 136.22 | -65.11  | -96.21  | < <b>0.001</b> | 57.34  |
| <i>Australopithecus</i>    | 48  |             | end-hylid         | 25.66       | 11.46     | 12.02  | 13.04 | -     | N/A  | 144 | 13.04  | -38.44  | -47.70  | < 0.001        | 13.01  |
| <i>Paranthropus</i>        | 46  |             | end-hylid         | 19.41       | 7.09      | 7.51   | 8.46  | 13.04 | N/A  | 184 | 112.36 | -51.18  | -55.94  | < <b>0.01</b>  | 6.97   |
| <i>Homo</i>                | 127 | LM cusp 6   | end-hylid         | 21.87       | 10.25     | 10.65  | 11.19 | 15.24 | N/A  | 508 | 211.29 | -100.65 | -118.52 | < <b>0.001</b> | 8.91   |
| <i>H. sapiens</i> (recent) | 67  |             | end-hylid         | 28.62       | 14.26     | 14.68  | 17.90 | N/A   |      | 201 | 77.88  | -34.94  | -44.97  | < <b>0.001</b> | 17.50  |
| <i>Pan</i>                 | 69  |             | end-hylid         | 18.31       | 6.99      | 7.81   | 8.54  | 12.53 | N/A  | 276 | 189.86 | -89.93  | -95.75  | < <b>0.001</b> | 6.24   |
| <i>Pongo</i>               | 29  |             | end-hylid         | 44.13       | 23.23     | 23.65  | 25.24 | N/A   |      | 87  | 31.32  | -11.66  | -15.79  | < <b>0.01</b>  | 82.52  |
| <i>Australopithecus</i>    | 19  |             | med-end           | 19.11       | 10.25     | 11.40  | 11.85 | 13.86 | N/A  | 76  | 50.06  | -20.03  | -22.64  | < <b>0.05</b>  | 6.76   |
| <i>Homo</i>                | 39  | LM cusp 7   | med-end           | 8.81        | 5.31      | 6.57   | -     | N/A   |      | 78  | 65.49  | -29.75  | -30.41  | N.S.           | 2.41   |
| <i>Pan</i>                 | 46  |             | med-end           | 4.00        | 3.28      | 5.10   | 5.82  | -     | N/A  | 138 | 68.70  | -30.35  | -30.48  | N.S.           | 1.49   |

Genera not included indicate that the feature was invariably absent/present or that samples did not possess enough grades of expression/number of specimens for statistical analysis

LL (h1): log-likelihood of estimated model; LL (h0): log-likelihood of null model; df: degrees of freedom; AIC: Akaike information criterion

me: metacone; hyp: hypocone; med: metaconid; end: entoconid; hyd: hypoconid; hylid: hypoconulid; N/A: not applicable

\* *p*-value of likelihood ratio test (significant values bolded); N.S.: non-significant

\*\* odds ratios scaled to 0.1 as per Hunter et al. (17)



**table S2. Fossil hominin upper molars used in this study including accession number, locality/site, and source.**

| Taxon                   | Specimen ID       | Locality/Site (Country)     | UM1 | UM2 | UM3 | UM12 | UM |
|-------------------------|-------------------|-----------------------------|-----|-----|-----|------|----|
| <i>A. anamensis</i>     | KNM-ER 30200      | Koobi Fora (Kenya)          | X   | X   |     |      |    |
| <i>A. anamensis</i>     | KNM-ER 30745      | Koobi Fora (Kenya)          | X   |     |     |      |    |
| <i>A. anamensis</i>     | KNM-ER 7727       | Koobi Fora (Kenya)          |     | X   |     |      |    |
| <i>A. anamensis</i>     | KNM-KP 34725g     | Kanapoi (Kenya)             |     | X   |     |      |    |
| <i>A. afarensis</i>     | AL 200-1a         | Hadar (Ethiopia)            |     | X   |     |      |    |
| <i>A. afarensis</i>     | AL 333-86         | Hadar (Ethiopia)            | X   |     |     |      |    |
| <i>A. cf. afarensis</i> | KNM-WT 16003      | West Turkana (Kenya)        |     |     | X   |      |    |
| <i>A. afarensis</i>     | L 144-23          | Omo (Ethiopia)              | X   |     |     |      |    |
| <i>A. cf. afarensis</i> | Omo 18-1970-17992 | Omo (Ethiopia)              |     |     |     |      | X  |
| <i>A. africanus</i>     | MLD 28            | Makapansgat (South Africa)  |     |     | X   |      |    |
| <i>A. africanus</i>     | STS 1             | Sterkfontein (South Africa) | X   |     |     |      |    |
| <i>A. africanus</i>     | STS 212           | Sterkfontein (South Africa) |     |     |     |      | X  |
| <i>A. africanus</i>     | STS 24a           | Sterkfontein (South Africa) | X   |     |     |      |    |
| <i>A. africanus</i>     | STS 28            | Sterkfontein (South Africa) |     | X   |     |      |    |
| <i>A. africanus</i>     | STS 30            | Sterkfontein (South Africa) |     | X   |     |      |    |
| <i>A. africanus</i>     | STS 37            | Sterkfontein (South Africa) |     | X   |     |      |    |
| <i>A. africanus</i>     | STS 52            | Sterkfontein (South Africa) |     | X   | X   |      |    |
| <i>A. africanus</i>     | STS 56            | Sterkfontein (South Africa) | X   | X   |     |      |    |
| <i>A. africanus</i>     | STS 8             | Sterkfontein (South Africa) | X   | X   |     |      |    |
| <i>A. africanus</i>     | STS 22            | Sterkfontein (South Africa) |     | X   |     |      |    |
| <i>A. africanus</i>     | STW 179           | Sterkfontein (South Africa) |     |     | X   |      |    |
| <i>A. africanus</i>     | STW 183           | Sterkfontein (South Africa) | X   | X   |     |      |    |
| <i>A. africanus</i>     | STW 189           | Sterkfontein (South Africa) |     |     | X   |      |    |
| <i>A. africanus</i>     | STW 252j          | Sterkfontein (South Africa) | X   |     |     |      |    |
| <i>A. africanus</i>     | STW 402           | Sterkfontein (South Africa) | X   |     |     |      |    |
| <i>A. africanus</i>     | STW 450           | Sterkfontein (South Africa) | X   |     |     |      |    |
| <i>A. africanus</i>     | STW 529           | Sterkfontein (South Africa) |     | X   |     |      |    |
| <i>A. africanus</i>     | STW 140           | Sterkfontein (South Africa) |     |     | X   |      |    |

|                     |                   |                             |   |   |   |
|---------------------|-------------------|-----------------------------|---|---|---|
| <i>A. africanus</i> | STW 151           | Sterkfontein (South Africa) | X |   |   |
| <i>A. africanus</i> | STW 183 (STW 128) | Sterkfontein (South Africa) |   |   | X |
| <i>A. africanus</i> | STW 280           | Sterkfontein (South Africa) |   | X |   |
| <i>A. africanus</i> | Taung             | Taung (South Africa)        | X | X |   |
| <i>A. africanus</i> | TM 1561           | Sterkfontein (South Africa) |   |   | X |
| <i>P. boisei</i>    | KNM-WT 17400      | West Turkana (Kenya)        | X | X | X |
| <i>P. robustus</i>  | DNH 3             | Drimolen (South Africa)     |   |   | X |
| <i>P. robustus</i>  | DNH 54            | Drimolen (South Africa)     |   |   | X |
| <i>P. robustus</i>  | DNH 57b           | Drimolen (South Africa)     | X |   |   |
| <i>P. robustus</i>  | DNH 60a           | Drimolen (South Africa)     | X |   |   |
| <i>P. robustus</i>  | DNH 62            | Drimolen (South Africa)     | X |   |   |
| <i>P. robustus</i>  | DNH 74            | Drimolen (South Africa)     |   | X |   |
| <i>P. robustus</i>  | SK 13.14          | Swartkrans (South Africa)   | X | X | X |
| <i>P. robustus</i>  | SK 14129a         | Swartkrans (South Africa)   | X |   |   |
| <i>P. robustus</i>  | SK 16.1591        | Swartkrans (South Africa)   | X | X |   |
| <i>P. robustus</i>  | SK 41             | Swartkrans (South Africa)   |   |   | X |
| <i>P. robustus</i>  | SK 47             | Swartkrans (South Africa)   | X | X |   |
| <i>P. robustus</i>  | SK 48             | Swartkrans (South Africa)   | X | X | X |
| <i>P. robustus</i>  | SK 49             | Swartkrans (South Africa)   |   | X |   |
| <i>P. robustus</i>  | SK 52             | Swartkrans (South Africa)   | X | X |   |
| <i>P. robustus</i>  | SK 826a2          | Swartkrans (South Africa)   |   | X |   |
| <i>P. robustus</i>  | SK 829            | Swartkrans (South Africa)   | X |   |   |
| <i>P. robustus</i>  | SK 831a           | Swartkrans (South Africa)   |   |   | X |
| <i>P. robustus</i>  | SK 832            | Swartkrans (South Africa)   | X |   |   |
| <i>P. robustus</i>  | SK 834            | Swartkrans (South Africa)   |   | X |   |
| <i>P. robustus</i>  | SK 838a           | Swartkrans (South Africa)   | X |   |   |
| <i>P. robustus</i>  | SK 102            | Swartkrans (South Africa)   | X |   |   |
| <i>P. robustus</i>  | SK 89             | Swartkrans (South Africa)   | X |   |   |
| <i>P. robustus</i>  | SKW 33            | Swartkrans (South Africa)   |   | X |   |
| <i>P. robustus</i>  | SKX 21841         | Swartkrans (South Africa)   |   |   | X |
| <i>P. robustus</i>  | TM 1517a          | Kromdraai (South Africa)    | X | X |   |

|                                         |                   |                                                     |   |   |   |
|-----------------------------------------|-------------------|-----------------------------------------------------|---|---|---|
| <i>P. robustus</i>                      | TM 1517c          | Kromdraai (South Africa)                            |   | X | X |
| <i>P. robustus</i>                      | TM 1601e          | Kromdraai (South Africa)                            | X |   |   |
| <i>Homo sp./habilis s.l.</i>            | DNH 39            | Drimolen (South Africa)                             | X |   |   |
| <i>Homo sp./habilis s.l.</i>            | DNH 70            | Drimolen (South Africa)                             | X |   |   |
| <i>Homo sp./habilis s.l.</i>            | KNM-ER 1590l      | Koobi Fora (Kenya)                                  | X |   |   |
| <i>Homo sp./habilis s.l.</i>            | KNM-ER 1590m      | Koobi Fora (Kenya)                                  |   | X |   |
| <i>Homo sp./habilis s.l.</i>            | SKX 268           | Swartkrans (South Africa)                           | X |   |   |
| <i>Homo sp./habilis s.l.</i>            | KNM-ER 1813       | Koobi Fora (Kenya)                                  |   | X |   |
| <i>H. erectus s.l.</i>                  | KNM-ER 1808h      | Koobi Fora (Kenya)                                  |   | X |   |
| <i>H. erectus s.l.</i>                  | Sangiran 4        | Sangiran, Java (Indonesia)                          | X | X |   |
| <i>H. erectus s.l.</i>                  | Sangiran 7-3b     | Sangiran, Java (Indonesia)                          | X |   |   |
| <i>H. erectus s.l.</i>                  | Sangiran 7-3c     | Sangiran, Java (Indonesia)                          |   | X |   |
| Middle Pleistocene<br>European hominins | Steinheim         | Steinheim an der Murr (Germany)                     | X | X |   |
| <i>H. neanderthalensis</i>              | BD8               | Abri Bourgeois-Delaunay, La<br>Chaise Cave (France) | X | X |   |
| <i>H. neanderthalensis</i>              | Combe-Grenal IX   | Combe-Grenal Cave (France)                          |   | X |   |
| <i>H. neanderthalensis</i>              | Combe-Grenal XIII | Combe-Grenal Cave (France)                          | X |   |   |
| <i>H. neanderthalensis</i>              | Kebara-dumps      | Kebara Cave (Israel)                                |   |   | X |
| <i>H. neanderthalensis</i>              | KMH 21            | Kebara Cave (Israel)                                | X |   |   |
| <i>H. neanderthalensis</i>              | KMH 24            | Kebara Cave (Israel)                                |   |   | X |
| <i>H. neanderthalensis</i>              | KRP 100           | Krapina (Croatia)                                   | X |   |   |
| <i>H. neanderthalensis</i>              | KRP 101           | Krapina (Croatia)                                   |   | X |   |
| <i>H. neanderthalensis</i>              | KRP 134           | Krapina (Croatia)                                   | X |   |   |
| <i>H. neanderthalensis</i>              | KRP 135           | Krapina (Croatia)                                   |   | X |   |
| <i>H. neanderthalensis</i>              | KRP 136           | Krapina (Croatia)                                   | X |   |   |
| <i>H. neanderthalensis</i>              | KRP 165           | Krapina (Croatia)                                   |   | X |   |
| <i>H. neanderthalensis</i>              | KRP 166           | Krapina (Croatia)                                   |   | X |   |
| <i>H. neanderthalensis</i>              | KRP 169           | Krapina (Croatia)                                   |   | X |   |
| <i>H. neanderthalensis</i>              | KRP 171           | Krapina (Croatia)                                   | X |   |   |
| <i>H. neanderthalensis</i>              | KRP 175           | Krapina (Croatia)                                   |   | X |   |

|                                                 |                 |                                            |   |   |   |   |
|-------------------------------------------------|-----------------|--------------------------------------------|---|---|---|---|
| <i>H. neanderthalensis</i>                      | KRP 177         | Krapina (Croatia)                          |   | X |   |   |
| <i>H. neanderthalensis</i>                      | KRP 192         | Krapina (Croatia)                          |   | X |   |   |
| <i>H. neanderthalensis</i>                      | KRP 58          | Krapina (Croatia)                          |   |   |   | X |
| <i>H. neanderthalensis</i>                      | KRP 96          | Krapina (Croatia)                          |   | X |   |   |
| <i>H. neanderthalensis</i>                      | KRP 97          | Krapina (Croatia)                          |   |   |   | X |
| <i>H. neanderthalensis</i>                      | KRP 98          | Krapina (Croatia)                          |   | X |   |   |
| <i>H. neanderthalensis</i>                      | KRP 45          | Krapina (Croatia)                          | X |   |   |   |
| <i>H. neanderthalensis</i>                      | KRP 46          | Krapina (Croatia)                          | X |   |   |   |
| <i>H. neanderthalensis</i>                      | KRP 47          | Krapina (Croatia)                          | X | X |   |   |
| <i>H. neanderthalensis</i>                      | KRP 48          | Krapina (Croatia)                          | X | X |   |   |
| <i>H. neanderthalensis</i>                      | La Ferrassie 8  | La Ferrassie (France)                      | X |   |   |   |
| <i>H. neanderthalensis</i>                      | La Quina H18    | La Quina (France)                          | X | X |   |   |
| <i>H. neanderthalensis</i>                      | Le Moustier 1   | Le Moustier (France)                       | X | X |   |   |
| <i>H. neanderthalensis</i>                      | Roc de Marsal   | Roc de Marsal (France)                     | X |   |   |   |
| <i>H. neanderthalensis</i>                      | SCLA 4A-4       | Scladina Cave (Belgium)                    | X |   |   |   |
| <i>H. neanderthalensis</i>                      | SD 1105         | El Sidrón (Spain)                          | X |   |   |   |
| <i>H. neanderthalensis</i>                      | SD 407          | El Sidrón (Spain)                          | X |   |   |   |
| <i>H. neanderthalensis</i>                      | SD 531          | El Sidrón (Spain)                          | X |   |   |   |
| <i>H. neanderthalensis</i>                      | SD 4            | El Sidrón (Spain)                          |   | X |   |   |
| <i>H. neanderthalensis</i>                      | SD 551          | El Sidrón (Spain)                          |   | X |   |   |
| <i>H. neanderthalensis</i>                      | Saint-Césaire 1 | La Roche a Pierrot, Saint-Césaire (France) |   | X |   |   |
| <i>H. sapiens</i> (Pleistocene /early Holocene) | Combe-Capelle   | Combe-Capelle (France)                     |   | X |   |   |
| <i>H. sapiens</i> (Pleistocene)                 | Equus Cave H10  | Equus Cave (South Africa)                  |   |   |   | X |
| <i>H. sapiens</i> (Pleistocene)                 | Oberkassel D999 | Oberkassel (Germany)                       |   |   | X |   |
| <i>H. sapiens</i> (Pleistocene)                 | Qafzeh 11       | Qafzeh Cave (Israel)                       | X | X |   |   |
| <i>H. sapiens</i> (Pleistocene)                 | Qafzeh 10       | Qafzeh Cave (Israel)                       | X |   |   |   |
| <i>H. sapiens</i> (Pleistocene)                 | Qafzeh 15       | Qafzeh Cave (Israel)                       | X | X |   |   |
| <i>H. sapiens</i> (Pleistocene)                 | Qafzeh9         | Qafzeh Cave (Israel)                       |   | X |   |   |
| <i>H. sapiens</i> (Pleistocene)                 | Skhūl I         | Skhūl Cave (Israel)                        | X |   |   |   |

|                                 |             |                                     |   |   |
|---------------------------------|-------------|-------------------------------------|---|---|
| <i>H. sapiens</i> (Pleistocene) | Témara IB19 | Contrebandiers, Témara<br>(Morocco) | X |   |
| <i>H. sapiens</i> (Pleistocene) | Témara T2   | Contrebandiers, Témara<br>(Morocco) |   | X |

---

\* The X indicates which tooth/teeth are represented for each specimen.

**table S3. Fossil hominin lower molars used in this study including accession number, locality/site, and source.**

| Taxon               | Specimen ID       | Locality/Site (Country)     | LM1 | LM2 | LM3 | LM12 | LM |
|---------------------|-------------------|-----------------------------|-----|-----|-----|------|----|
| <i>A. anamensis</i> | KNM-KP 34725r     | Kanapoi (Kenya)             | X   |     |     |      |    |
| <i>A. anamensis</i> | KNM-KP 29286      | Kanapoi (Kenya)             | X   | X   |     |      |    |
| <i>A. anamensis</i> | KNM-KP 31712j     | Kanapoi (Kenya)             | X   |     |     |      |    |
| <i>A. anamensis</i> | KNM-ER 35233      | Koobi Fora (Kenya)          |     | X   |     |      |    |
| <i>A. anamensis</i> | KNM-KP 29281      | Kanapoi (Kenya)             |     | X   |     |      |    |
| <i>A. anamensis</i> | KNM-KP 34725t     | Kanapoi (Kenya)             |     | X   |     |      |    |
| <i>A. afarensis</i> | AL 145-35         | Hadar (Ethiopia)            | X   |     |     |      |    |
| <i>A. afarensis</i> | AL 333w-1a        | Hadar (Ethiopia)            | X   |     |     |      |    |
| <i>A. afarensis</i> | AL 128-23         | Hadar (Ethiopia)            |     | X   |     |      |    |
| <i>A. afarensis</i> | AL 241-14         | Hadar (Ethiopia)            |     | X   |     |      |    |
| <i>A. afarensis</i> | AL 333w-1a        | Hadar (Ethiopia)            |     | X   |     |      |    |
| <i>A. afarensis</i> | AL 145-35         | Hadar (Ethiopia)            |     | X   |     |      |    |
| <i>A. afarensis</i> | AL 333w-32        | Hadar (Ethiopia)            |     |     | X   |      |    |
| <i>A. afarensis</i> | AL 188-1          | Hadar (Ethiopia)            |     |     | X   |      |    |
| <i>A. africanus</i> | MLD 2             | Makapansgat (South Africa)  |     | X   |     |      |    |
| <i>A. africanus</i> | STS 18            | Sterkfontein (South Africa) | X   |     |     |      |    |
| <i>A. africanus</i> | STS 24            | Sterkfontein (South Africa) | X   |     |     |      |    |
| <i>A. africanus</i> | STS 52b           | Sterkfontein (South Africa) | X   | X   |     |      |    |
| <i>A. africanus</i> | STS 9             | Sterkfontein (South Africa) | X   |     |     |      |    |
| <i>A. africanus</i> | STW 123b          | Sterkfontein (South Africa) | X   |     |     |      |    |
| <i>A. africanus</i> | STW 3             | Sterkfontein (South Africa) |     | X   |     |      |    |
| <i>A. africanus</i> | STW 560d          | Sterkfontein (South Africa) |     | X   |     |      |    |
| <i>A. africanus</i> | STW 586           | Sterkfontein (South Africa) |     |     | X   |      |    |
| <i>A. africanus</i> | STW 106           | Sterkfontein (South Africa) | X   |     |     |      |    |
| <i>A. africanus</i> | STW 109           | Sterkfontein (South Africa) |     | X   |     |      |    |
| <i>A. africanus</i> | STW 133           | Sterkfontein (South Africa) |     |     | X   |      |    |
| <i>A. africanus</i> | STW 14            | Sterkfontein (South Africa) |     | X   | X   |      |    |
| <i>A. africanus</i> | STW 142 (STW 312) | Sterkfontein (South Africa) |     |     | X   |      |    |

|                     |                   |                             |   |   |   |
|---------------------|-------------------|-----------------------------|---|---|---|
| <i>A. africanus</i> | STW 145           | Sterkfontein (South Africa) | X |   |   |
| <i>A. africanus</i> | STW 213           | Sterkfontein (South Africa) |   | X |   |
| <i>A. africanus</i> | STW 234           | Sterkfontein (South Africa) |   | X |   |
| <i>A. africanus</i> | STW 235           | Sterkfontein (South Africa) |   | X |   |
| <i>A. africanus</i> | STW 246           | Sterkfontein (South Africa) | X |   |   |
| <i>A. africanus</i> | STW 278           | Sterkfontein (South Africa) |   |   | X |
| <i>A. africanus</i> | STW 308           | Sterkfontein (South Africa) |   | X |   |
| <i>A. africanus</i> | STW 309A          | Sterkfontein (South Africa) | X |   |   |
| <i>A. africanus</i> | STW 327           | Sterkfontein (South Africa) | X |   |   |
| <i>A. africanus</i> | STW 327           | Sterkfontein (South Africa) |   | X | X |
| <i>A. africanus</i> | STW 364           | Sterkfontein (South Africa) | X |   |   |
| <i>A. africanus</i> | STW 384           | Sterkfontein (South Africa) |   |   | X |
| <i>A. africanus</i> | STW 404           | Sterkfontein (South Africa) |   |   | X |
| <i>A. africanus</i> | STW 412A          | Sterkfontein (South Africa) |   | X |   |
| <i>A. africanus</i> | STW 412B          | Sterkfontein (South Africa) |   | X |   |
| <i>A. africanus</i> | STW 421A          | Sterkfontein (South Africa) | X |   |   |
| <i>A. africanus</i> | STW 421B          | Sterkfontein (South Africa) | X |   |   |
| <i>A. africanus</i> | STW 424           | Sterkfontein (South Africa) |   | X |   |
| <i>A. africanus</i> | STW 491           | Sterkfontein (South Africa) |   | X | X |
| <i>A. africanus</i> | STW 498c          | Sterkfontein (South Africa) |   | X | X |
| <i>A. africanus</i> | STW 520           | Sterkfontein (South Africa) |   |   | X |
| <i>A. africanus</i> | STW 537 (STW 269) | Sterkfontein (South Africa) |   | X |   |
| <i>A. africanus</i> | STW 537           | Sterkfontein (South Africa) |   | X |   |
| <i>A. africanus</i> | STW 537           | Sterkfontein (South Africa) |   |   | X |
| <i>A. africanus</i> | STW 537           | Sterkfontein (South Africa) |   |   | X |
| <i>A. africanus</i> | STW 555           | Sterkfontein (South Africa) |   | X |   |
| <i>A. africanus</i> | STW 560a          | Sterkfontein (South Africa) |   |   | X |
| <i>A. africanus</i> | STW 560b          | Sterkfontein (South Africa) |   |   | X |
| <i>A. africanus</i> | STW 560e          | Sterkfontein (South Africa) |   | X |   |
| <i>A. africanus</i> | Taung             | Taung (South Africa)        | X | X |   |
| <i>A. africanus</i> | TM 1520           | Sterkfontein (South Africa) |   |   | X |

|                       |                  |                           |   |   |   |
|-----------------------|------------------|---------------------------|---|---|---|
| <i>P. aethiopicus</i> | L62-17           | Omo (Ethiopia)            |   | X |   |
| <i>P. aethiopicus</i> | L157-35          | Omo (Ethiopia)            |   | X |   |
| <i>P. boisei</i>      | KNM-ER 60802     | Koobi Fora (Kenya)        |   |   | X |
| <i>P. boisei</i>      | KNM-ER 25520     | Koobi Fora (Kenya)        |   | X |   |
| <i>P. boisei</i>      | KNM-ER 15930     | Koobi Fora (Kenya)        |   | X |   |
| <i>P. boisei</i>      | L427-7           | Omo (Ethiopia)            |   | X |   |
| <i>P. boisei</i>      | Omo F203         | Omo (Ethiopia)            |   | X |   |
| <i>P. boisei</i>      | Omo 47-1973_1500 | Omo (Ethiopia)            |   |   | X |
| <i>P. robustus</i>    | DNH 18           | Drimolen (South Africa)   |   |   | X |
| <i>P. robustus</i>    | DNH 21           | Drimolen (South Africa)   |   |   | X |
| <i>P. robustus</i>    | DNH 46           | Drimolen (South Africa)   | X |   |   |
| <i>P. robustus</i>    | DNH 51           | Drimolen (South Africa)   |   |   | X |
| <i>P. robustus</i>    | DNH 60B          | Drimolen (South Africa)   | X |   |   |
| <i>P. robustus</i>    | DNH 60C          | Drimolen (South Africa)   |   | X |   |
| <i>P. robustus</i>    | DNH 8            | Drimolen (South Africa)   | X | X | X |
| <i>P. robustus</i>    | GDA 2            | Gondolin (South Africa)   |   | X |   |
| <i>P. robustus</i>    | SK 1587a         | Swartkrans (South Africa) |   | X |   |
| <i>P. robustus</i>    | SK 1             | Swartkrans (South Africa) |   | X |   |
| <i>P. robustus</i>    | SK 104           | Swartkrans (South Africa) | X |   |   |
| <i>P. robustus</i>    | SK 1587a         | Swartkrans (South Africa) | X |   |   |
| <i>P. robustus</i>    | SK 1587b         | Swartkrans (South Africa) |   | X |   |
| <i>P. robustus</i>    | SK 1588          | Swartkrans (South Africa) | X |   |   |
| <i>P. robustus</i>    | SK 22            | Swartkrans (South Africa) |   |   | X |
| <i>P. robustus</i>    | SK 23            | Swartkrans (South Africa) | X | X | X |
| <i>P. robustus</i>    | SK 25            | Swartkrans (South Africa) | X | X |   |
| <i>P. robustus</i>    | SK 34            | Swartkrans (South Africa) |   | X |   |
| <i>P. robustus</i>    | SK 3974          | Swartkrans (South Africa) | X |   |   |
| <i>P. robustus</i>    | SK 3978          | Swartkrans (South Africa) | X |   |   |
| <i>P. robustus</i>    | SK 6             | Swartkrans (South Africa) | X | X | X |
| <i>P. robustus</i>    | SK 61            | Swartkrans (South Africa) | X |   |   |
| <i>P. robustus</i>    | SK 62            | Swartkrans (South Africa) | X |   |   |



|                                         |                 |                                                     |   |   |   |
|-----------------------------------------|-----------------|-----------------------------------------------------|---|---|---|
| <i>P. robustus</i>                      | SK 63           | Swartkrans (South Africa)                           | X |   |   |
| <i>P. robustus</i>                      | SK 64           | Swartkrans (South Africa)                           | X |   |   |
| <i>P. robustus</i>                      | SK 75           | Swartkrans (South Africa)                           |   |   | X |
| <i>P. robustus</i>                      | SK 828          | Swartkrans (South Africa)                           | X |   |   |
| <i>P. robustus</i>                      | SK 843          | Swartkrans (South Africa)                           | X | X | X |
| <i>P. robustus</i>                      | SK 846a         | Swartkrans (South Africa)                           | X |   |   |
| <i>P. robustus</i>                      | SK 851          | Swartkrans (South Africa)                           |   |   | X |
| <i>P. robustus</i>                      | SK W5           | Swartkrans (South Africa)                           | X | X |   |
| <i>P. robustus</i>                      | SK X4446        | Swartkrans (South Africa)                           | X | X |   |
| <i>P. robustus</i>                      | SK X5002        | Swartkrans (South Africa)                           |   |   | X |
| <i>P. robustus</i>                      | SK X5014        | Swartkrans (South Africa)                           |   |   | X |
| <i>P. robustus</i>                      | TM1600          | Kromdraai (South Africa)                            |   | X | X |
| <i>Homo sp./habilis s.l.</i>            | DNH 67          | Drimolen (South Africa)                             | X |   |   |
| <i>Homo sp./habilis s.l.</i>            | KNM-ER 1802     | Koobi Fora (Kenya)                                  | X | X |   |
| <i>Homo sp./habilis s.l.</i>            | KNM-ER 2597     | Koobi Fora (Kenya)                                  |   | X |   |
| <i>Homo sp./habilis s.l.</i>            | L26-1g          | Omo (Ethiopia)                                      | X |   |   |
| <i>Homo sp./habilis s.l.</i>            | Omo K7_1969_17  | Omo (Ethiopia)                                      | X |   |   |
| <i>Homo sp./habilis s.l.</i>            | SK 15           | Swartkrans (South Africa)                           |   | X | X |
| <i>Homo sp./habilis s.l.</i>            | SKX 258         | Swartkrans (South Africa)                           | X |   |   |
| <i>H. erectus s.l.</i>                  | S1b             | Sangiran, Java (Indonesia)                          | X | X |   |
| <i>H. erectus s.l.</i>                  | KNM-BK 67       | Baringo Kapthurin (Kenya)                           |   | X | X |
| Middle Pleistocene<br>European hominins | Mauer           | Mauer (Germany)                                     | X | X | X |
| <i>H. neanderthalensis</i>              | La Chaise 14-7  | Abri Bourgeois-Delaunay, La Chaise<br>Cave (France) | X |   |   |
| <i>H. neanderthalensis</i>              | La Chaise 49    | Abri Bourgeois-Delaunay, La Chaise<br>Cave (France) | X |   |   |
| <i>H. neanderthalensis</i>              | La Chaise 5     | Abri Bourgeois-Delaunay, La Chaise<br>Cave (France) | X |   |   |
| <i>H. neanderthalensis</i>              | Combe-Grenal I  | Combe-Grenal Cave (France)                          | X |   |   |
| <i>H. neanderthalensis</i>              | Combe-Grenal IV | Combe-Grenal Cave (France)                          | X |   |   |

|                            |                           |                                                  |   |   |   |
|----------------------------|---------------------------|--------------------------------------------------|---|---|---|
| <i>H. neanderthalensis</i> | 1048/69                   | Weimar - Ehringsdorf (Germany)                   | X |   |   |
| <i>H. neanderthalensis</i> | KRP 9                     | Krapina (Croatia)                                |   |   | X |
| <i>H. neanderthalensis</i> | La Chaise 36              | Abri Bourgeois-Delaunay, La Chaise Cave (France) |   |   | X |
| <i>H. neanderthalensis</i> | KMH 14                    | Kebara Cave (Israel)                             |   | X |   |
| <i>H. neanderthalensis</i> | KMH 18                    | Kebara Cave (Israel)                             |   | X |   |
| <i>H. neanderthalensis</i> | KMH 4                     | Kebara Cave (Israel)                             | X |   |   |
| <i>H. neanderthalensis</i> | KRP 57                    | Krapina (Croatia)                                |   | X |   |
| <i>H. neanderthalensis</i> | KRP 59                    | Krapina (Croatia)                                |   | X |   |
| <i>H. neanderthalensis</i> | KRP 52                    | Krapina (Croatia)                                | X |   |   |
| <i>H. neanderthalensis</i> | KRP 1                     | Krapina (Croatia)                                |   | X |   |
| <i>H. neanderthalensis</i> | KRP 106                   | Krapina (Croatia)                                |   |   | X |
| <i>H. neanderthalensis</i> | KRP 107                   | Krapina (Croatia)                                |   | X |   |
| <i>H. neanderthalensis</i> | KRP 6                     | Krapina (Croatia)                                |   | X |   |
| <i>H. neanderthalensis</i> | KRP 10                    | Krapina (Croatia)                                |   | X |   |
| <i>H. neanderthalensis</i> | KRP 104                   | Krapina (Croatia)                                |   | X |   |
| <i>H. neanderthalensis</i> | KRP 105                   | Krapina (Croatia)                                |   | X |   |
| <i>H. neanderthalensis</i> | KRP 53                    | Krapina (Croatia)                                | X | X |   |
| <i>H. neanderthalensis</i> | KRP 54                    | Krapina (Croatia)                                | X | X |   |
| <i>H. neanderthalensis</i> | KRP 55                    | Krapina (Croatia)                                | X | X |   |
| <i>H. neanderthalensis</i> | KRP 79                    | Krapina (Croatia)                                | X |   |   |
| <i>H. neanderthalensis</i> | KRP 80                    | Krapina (Croatia)                                |   | X |   |
| <i>H. neanderthalensis</i> | KRP 81                    | Krapina (Croatia)                                | X |   |   |
| <i>H. neanderthalensis</i> | KRP 86                    | Krapina (Croatia)                                |   | X |   |
| <i>H. neanderthalensis</i> | La Quina H9               | La Quina (France)                                |   | X |   |
| <i>H. neanderthalensis</i> | La Chaise 36              | Abri Bourgeois-Delaunay, La Chaise Cave (France) |   | X |   |
| <i>H. neanderthalensis</i> | LaFerrassie_8             | La Ferrassie (France)                            | X |   |   |
| <i>H. neanderthalensis</i> | Le Moustier 1 (left side) | Le Moustier (France)                             |   | X | X |

|                                 |                            |                                  |   |   |   |
|---------------------------------|----------------------------|----------------------------------|---|---|---|
| <i>H. neanderthalensis</i>      | Le Moustier 1 (right side) | Le Moustier (France)             | X |   |   |
| <i>H. neanderthalensis</i>      | Regourdou                  | Le Regourdou, Montignac (France) |   | X | X |
| <i>H. neanderthalensis</i>      | Roc de Marsal              | Roc de Marsal (France)           | X |   |   |
| <i>H. neanderthalensis</i>      | Scla 4A-1                  | Scldina Cave (Belgium)           | X | X | X |
| <i>H. neanderthalensis</i>      | SD 540                     | El Sidrón (Spain)                |   | X |   |
| <i>H. neanderthalensis</i>      | SD 780                     | El Sidrón (Spain)                | X |   |   |
| <i>H. neanderthalensis</i>      | SD 755                     | El Sidrón (Spain)                |   | X |   |
| <i>H. neanderthalensis</i>      | SR 756                     | El Sidrón (Spain)                | X |   |   |
| <i>H. neanderthalensis</i>      | Vi 11-39                   | Vindija (Croatia)                |   | X | X |
| <i>H. sapiens</i> (Pleistocene) | DES H4                     | Dar es Soltane II (Morocco)      |   | X | X |
| <i>H. sapiens</i> (Pleistocene) | El Harhoura                | El Harhoura (Morocco)            |   | X | X |
| <i>H. sapiens</i> (Pleistocene) | Equus Cave H3              | Equus Cave (South Africa)        |   |   | X |
| <i>H. sapiens</i> (Pleistocene) | Equus Cave H5              | Equus Cave (South Africa)        |   |   | X |
| <i>H. sapiens</i> (Pleistocene) | Equus Cave H8              | Equus Cave (South Africa)        |   | X |   |
| <i>H. sapiens</i> (Pleistocene) | Hayonim 17                 | Hayonim (Israel)                 |   | X |   |
| <i>H. sapiens</i> (Pleistocene) | Hayonim 19                 | Hayonim (Israel)                 |   | X | X |
| <i>H. sapiens</i> (Pleistocene) | Hayonim 20                 | Hayonim (Israel)                 |   |   | X |
| <i>H. sapiens</i> (Pleistocene) | Hayonim 8                  | Hayonim (Israel)                 |   |   | X |
| <i>H. sapiens</i> (Pleistocene) | Irhoud 3                   | Jebel Irhoud (Morocco)           | X |   |   |
| <i>H. sapiens</i> (Pleistocene) | Nahal-Oren 8               | Nahal Oren (Israel)              |   | X | X |
| <i>H. sapiens</i> (Pleistocene) | Qafzeh 10                  | Qafzeh Cave (Israel)             |   | X |   |
| <i>H. sapiens</i> (Pleistocene) | Qafzeh 11                  | Qafzeh Cave (Israel)             |   | X | X |
| <i>H. sapiens</i> (Pleistocene) | Qafzeh 15                  | Qafzeh Cave (Israel)             | X | X |   |
| <i>H. sapiens</i> (Pleistocene) | SAM AP 6242                | Die Kelders (South Africa)       |   |   | X |
| <i>H. sapiens</i> (Pleistocene) | SAM AP 6277                | Die Kelders (South Africa)       |   |   | X |
| <i>H. sapiens</i> (Pleistocene) | Témara                     | Contrebandiers, Témara (Morocco) |   | X | X |
| <i>H. sapiens</i> (Pleistocene) | Témara T3a                 | Contrebandiers, Témara (Morocco) | X |   |   |

\* The X indicates which tooth/teeth are represented for each specimen.

**table S4. System used in this study for scoring accessory cusps.**

| Trait expression                                                                                                                                                                                                                                                                                                                                                                                                                    |                           |
|-------------------------------------------------------------------------------------------------------------------------------------------------------------------------------------------------------------------------------------------------------------------------------------------------------------------------------------------------------------------------------------------------------------------------------------|---------------------------|
| <b>ASUDAS* for UMC5, LMC5, LMC6 and LMC7</b>                                                                                                                                                                                                                                                                                                                                                                                        | <b>Simplified scoring</b> |
| 0: cusp is absent                                                                                                                                                                                                                                                                                                                                                                                                                   | Absent                    |
| 0.5: indecisive category                                                                                                                                                                                                                                                                                                                                                                                                            | Suspected                 |
| 1: cusp is present and very small                                                                                                                                                                                                                                                                                                                                                                                                   | Faint                     |
| 2: cusp is small                                                                                                                                                                                                                                                                                                                                                                                                                    |                           |
| 3: cusp is medium-sized                                                                                                                                                                                                                                                                                                                                                                                                             | Moderate                  |
| 4: cusp is large                                                                                                                                                                                                                                                                                                                                                                                                                    |                           |
| 5: cusp is very large                                                                                                                                                                                                                                                                                                                                                                                                               | Large                     |
| <b>Scoring system for hypocone, UMC6 and LMC6 "double"</b>                                                                                                                                                                                                                                                                                                                                                                          | <b>Simplified scoring</b> |
| 0/1: Hypocone                                                                                                                                                                                                                                                                                                                                                                                                                       | Absent/Present            |
| 0/1: UMC6                                                                                                                                                                                                                                                                                                                                                                                                                           | Absent/Present            |
| 0/1: LMC6 "double"                                                                                                                                                                                                                                                                                                                                                                                                                  | Absent/Present            |
| <b>ASUDAS for Carabelli's cusp in <i>Homo</i></b>                                                                                                                                                                                                                                                                                                                                                                                   | <b>Simplified scoring</b> |
| 0: the mesiolingual aspect of cusp 1 is smooth                                                                                                                                                                                                                                                                                                                                                                                      | Absent                    |
| 1: a groove is present                                                                                                                                                                                                                                                                                                                                                                                                              | Faint                     |
| 2: a pit is present                                                                                                                                                                                                                                                                                                                                                                                                                 |                           |
| 3: a small [or medium-sized] Y-shaped depression is present                                                                                                                                                                                                                                                                                                                                                                         | Moderate                  |
| 4: a large Y-shaped depression is present                                                                                                                                                                                                                                                                                                                                                                                           |                           |
| 5: a small cusp without a free apex occurs. The distal border of the cusp does not contact the lingual groove separating cusps 1 and 4                                                                                                                                                                                                                                                                                              |                           |
| 6: a medium-sized cusp with an attached apex making contact with the medial lingual groove is present                                                                                                                                                                                                                                                                                                                               | Large                     |
| 7: a large cusp is present                                                                                                                                                                                                                                                                                                                                                                                                          |                           |
| <b>Scoring system from van Reenen and Reid (40) for Carabelli's cusp in <i>Australopithecus</i> and <i>Paranthropus</i></b>                                                                                                                                                                                                                                                                                                         | <b>Simplified scoring</b> |
| 0: the mesiolingual aspect of cusp 1 is smooth                                                                                                                                                                                                                                                                                                                                                                                      | Absent                    |
| 1: the lingual cingulum is reduced to one or two short furrows or a single pit which may be fairly deep. The wrinkles are usually less prominent in this category but may have contributed to the formation of the short furrows which may be horizontal, vertical or oblique in direction                                                                                                                                          | Faint                     |
| 2: the lingual cingulum decreases further in length and prominence and together with the vertical furrows of wrinkled enamel produces a feature of great variability. There are usually between 3-7 vertical furrows on the protocone which sometimes branch at the occlusal end                                                                                                                                                    | Moderate                  |
| 3: the cingulum decreases further in length and prominence but the cuspules are larger                                                                                                                                                                                                                                                                                                                                              |                           |
| 4: the cingulum is usually shorter in length but carries one or more cuspules which may break the continuity of the furrow                                                                                                                                                                                                                                                                                                          |                           |
| 5: a complete lingual cingulum is present extending from the mesio-buccal corner of the crown traversing the lingual surface of the protocone in an oblique cervical direction and terminating in the occluso-lingual groove. Wrinkles on the enamel surface cross the cingulum in a vertical direction at almost right angles and on the cervical border of the cingulum usually produce small rounded bulges between each wrinkle | Large                     |
| <b>Scoring system from Ortiz et al. (25) for Carabelli's cusp in great apes</b>                                                                                                                                                                                                                                                                                                                                                     | <b>Simplified scoring</b> |
| 0: the mesiolingual aspect of the protocone is smooth                                                                                                                                                                                                                                                                                                                                                                               | Absent                    |
| 1: one or many minor depressions or vertical furrows are present on the mesiolingual aspect of the protocone                                                                                                                                                                                                                                                                                                                        | Faint                     |
| 2: a crest is present but is limited to the mesiolingual aspect of the protocone                                                                                                                                                                                                                                                                                                                                                    |                           |
| 3: a continuous, or semi-continuous, crest extends distally and traverses the lingual aspect of the protocone of the protocone. Although the crest is confined to the protocone, it may contact the median lingual groove separating the protocone and hypocone                                                                                                                                                                     | Moderate                  |
| 4: a continuous, or semi-continuous, crest traverses the lingual aspect of the protocone and extends distally onto the hypocone                                                                                                                                                                                                                                                                                                     | Large                     |

\*ASUDAS (ref. 36) with some minor modifications.

**table S5. Tooth size comparisons estimated from crown outline, centroid size, and 3D surface area.** For each UM and LM, yellow triangle: correlation coefficient with significant values bolded; gray triangle: slope / intercept of ordinary least square linear regression. Comparisons performed on the logged data.

| UM              | Crown outline | Centroid size | 3D surface area |
|-----------------|---------------|---------------|-----------------|
| Crown outline   | -             | 1.072/-0.388  | 1.222/-0.625    |
| Centroid size   | <b>0.878</b>  | -             | 1.140/-0.221    |
| 3D surface area | <b>0.856</b>  | <b>0.881</b>  | -               |
| LM              | Crown outline | Centroid size | 3D surface area |
| Crown outline   | -             | 1.112/-0.488  | 1.146/-0.474    |
| Centroid size   | <b>0.905</b>  | -             | 1.030/0.012     |
| 3D surface area | <b>0.906</b>  | <b>0.912</b>  | -               |
